# Supplementary material for: Pre-operative Machine Learning for Heart Transplant Patients Bridged with Temporary Mechanical Circulatory Support
Source: MDPI journal article supplement (doi:10.3390/jcdd9090311), 2022-09-19

**Table S1.** Baseline characteristics and demographics for patients who required temporary mechanical circulatory support for bridge to transplant (tMCS BTT) and those who did not. Variables represent recipient characteristics unless otherwise indicated.

|                                      | No tMCS<br>n=17,433 | tMCS BTT<br>n=1,584 | P value |
|--------------------------------------|---------------------|---------------------|---------|
| Age, years                           | 57 (47-63)          | 56 (46-62)          | <0.001  |
| Male sex                             | 12,985 (74.5%)      | 1,169 (73.8%)       | 0.55    |
| Diabetes                             | 4,994 (28.6%)       | 448 (28.3%)         | 0.76    |
| Body mass index (kg/m <sup>2</sup> ) | 27.1 (23.8-30.7)    | 26.1 (23.2-30.0)    | <0.001  |
| Ischemic time, hours                 | 3.1 (2.4-3.8)       | 3.1 (2.4-3.8)       | 0.81    |
| Total Days on Waitlist               | 116 (35-305)        | 34 (12-92)          | <0.001  |
| Follow-up Time, years                | 5.0 (3.0-7.7)       | 4.1 (2.9-6.9)       | <0.001  |
| Ethnicity                            |                     |                     | 0.35    |
| White                                | 11,503 (66.0%)      | 1,014 (64.0%)       |         |
| Black                                | 3,753 (21.5%)       | 371 (23.4%)         |         |
| Hispanic                             | 1,381 (7.9%)        | 125 (7.9%)          |         |
| Other                                | 796 (4.6%)          | 74 (4.7%)           |         |
| Donor Age, years                     | 30 (22-41)          | 31 (23-41)          | 0.28    |
| Donor Male Sex                       | 12,315 (70.6%)      | 1,066 (67.3%)       | 0.005   |
| Hemodynamics at Listing              |                     |                     |         |
| Cardiac Output                       | 4.16 (3.35-5.03)    | 3.9 (3.16-4.8)      | <0.001  |
| PCWP                                 | 19.0 (13.0-25.0)    | 22.0 (16.0-28.0)    | <0.001  |
| MPAP                                 | 29 (22-36)          | 32 (25-38)          | <0.001  |
| PA Systolic Pressure                 | 42 (32-53)          | 45 (36-55)          | <0.001  |
| PA Diastolic Pressure                | 20 (15-26)          | 23 (17-28)          | <0.001  |
| Inotrope usage                       | 5,672 (32.5%)       | 743 (46.9%)         | <0.001  |
| Hemodynamics at Transplant           |                     |                     |         |
| Cardiac Output                       | 4.42 (3.6-5.4)      | 4 (3.2-5)           | <0.001  |
| PCWP                                 | 17.0 (11.0-24.0)    | 22.0 (15.0-28.0)    | <0.001  |
| MPAP                                 | 26 (20-34)          | 31 (24-39)          | <0.001  |
| PA Systolic Pressure                 | 38 (30-49)          | 45 (35-55)          | <0.001  |
| PA Diastolic Pressure                | 18 (13-24)          | 23 (16-29)          | <0.001  |
| Inotrope usage                       | 6,205 (35.6%)       | 902 (56.9%)         | <0.001  |
| Serum creatinine (mg/dl)             | 1.20 (0.95-1.50)    | 1.19 (0.90-1.50)    | 0.16    |
| Total bilirubin (mg/dL)              | 0.7 (0.5-1.1)       | 0.9 (0.6-1.5)       | <0.001  |
| Implantable cardiac defibrillator    | 13,824 (79.9%)      | 1,157 (73.4%)       | <0.001  |

PCWP: pulmonary capillary wedge pressure; MPAP: mean pulmonary artery pressure; PA: pulmonary artery. Data are presented as median (IQR) for continuous measures, and n (%) for categorical measures.

**Table S2.** Feature (i.e., variable) importance ranked by gain (i.e., predictive utility in the final model). Features represent recipient characteristics unless otherwise indicated. Descriptions are derived from the thoracic organ Standard Transplant Analysis and Research (STAR) files.

| Rank | Feature                    | Description                                                                            | Gain        |
|------|----------------------------|----------------------------------------------------------------------------------------|-------------|
| 1    | FUNC_STAT_TRR              | Functional Status (Karnofsky performance score)                                        | 0.158512516 |
| 2    | INIT_AGE                   | Age in years at time of listing                                                        | 0.107789265 |
| 3    | HEMO_PCW_TRR               | Pulmonary capillary wedge pressure at transplant                                       | 0.098986965 |
| 4    | HEMO_CO_TRR                | Cardiac output at transplant                                                           | 0.084797351 |
| 5    | AGE                        | Age at transplant                                                                      | 0.079323797 |
| 6    | CREAT_TRR                  | Serum creatinine at transplant                                                         | 0.05437153  |
| 7    | ECMO_TRR                   | ECMO support at transplant                                                             | 0.049576131 |
| 8    | SGOT_DON                   | Donor last aspartate aminotransferase                                                  | 0.022711094 |
| 9    | HEMO_CO_TCR                | Cardiac output at listing                                                              | 0.022331076 |
| 10   | PRIOR_CARD_SURG_TYPE_TRR13 | Surgical ventricular remodeling surgery between listing and transplant                 | 0.021407742 |
| 11   | BMI_CALC                   | Body mass index                                                                        | 0.021316674 |
| 12   | TBILI                      | Serum total bilirubin at transplant                                                    | 0.020194779 |
| 13   | PRIOR_CARD_SURG_TYPE_TCR16 | Surgical ventricular remodeling surgery before listing                                 | 0.018108468 |
| 14   | HEMO_PCW_TCR               | Pulmonary capillary wedge pressure at listing                                          | 0.017537055 |
| 15   | INIT_WGT_KG_CALC           | Weight at listing                                                                      | 0.017062931 |
| 16   | DAYSWAIT_CHRON             | Total days on waiting list                                                             | 0.016572684 |
| 17   | HEMO_SYS_TCR               | Systolic pressure at listing                                                           | 0.011443448 |
| 18   | HGT_CM_CALC                | Height at listing                                                                      | 0.011385361 |
| 19   | HEMO_PA_MN_TCR             | Mean pulmonary artery pressure at listing                                              | 0.010553371 |
| 20   | AGE_DON                    | Donor age                                                                              | 0.008990021 |
| 21   | PRIOR_CARD_SURG_TYPE_TRR6  | Coronary artery bypass graft + valve repair/replacement between listing and transplant | 0.008841328 |
| 22   | PO2_FIO2_DON               | Donor FiO <sub>2</sub> (if applicable)                                                 | 0.008775327 |
| 23   | PO2                        | Donor pO <sub>2</sub> on 100% FiO <sub>2</sub>                                         | 0.008391518 |
| 24   | CPRA                       | Calculated panel reactive antibodies                                                   | 0.007533868 |
| 25   | EDUCATION3                 | Attended college/technical school                                                      | 0.006110179 |
| 26   | SGPT_DON                   | Donor last alanine aminotransferase                                                    | 0.005660703 |
| 27   | HEMO_PA_DIA_TCR            | Diastolic pulmonary artery pressure at listing                                         | 0.005061204 |
| 28   | TRANSFUS_TERM_DON          | Donor number of transfusions during terminal hospitalization                           | 0.004492959 |
| 29   | TCR_DGN8                   | Viral dilated cardiomyopathy diagnosis                                                 | 0.004488877 |
| 30   | BMI_TCR                    | Body mass index at listing                                                             | 0.003839232 |
| 31   | TCR_DUR_ABSTAIN            | If prior smoker, duration of abstinence                                                | 0.003825491 |
| 32   | END_HGT_CM_CALC            | Height at transplant                                                                   | 0.003633827 |

|    |                 |                                                   |             |
|----|-----------------|---------------------------------------------------|-------------|
| 33 | HEMATOCRIT_DON  | Donor hematocrit                                  | 0.003621744 |
| 34 | BMI_DON_CALC    | Donor body mass index                             | 0.003540091 |
| 35 | ABO3            | AB blood type                                     | 0.003346749 |
| 36 | HEMO_PA_DIA_TRR | Diastolic pulmonary artery pressure at transplant | 0.003235971 |
| 37 | ETHNICITY       | Hispanic ethnicity                                | 0.003149958 |
| 38 | CORONARY_ANGIO  | Abnormal donor coronary angiogram                 | 0.003001513 |
| 39 | CREAT_DON       | Donor creatinine                                  | 0.00277229  |
| 40 | ABO0            | Type O blood                                      | 0.00255622  |
| 41 | BUN_DON         | Donor blood urea nitrogen                         | 0.00242364  |
| 42 | IABP_TCR        | Intraaortic balloon pump support at listing       | 0.002228423 |
| 43 | DAYS_STAT1A     | Days in Status 1A                                 | 0.001749797 |

**Figure S1.** Unadjusted one year post-transplant Kaplan-Meier survival curves for those bridged to transplant with temporary mechanical circulatory support (tMCS BTT) and those without (No tMCS), compared using the log-rank test.

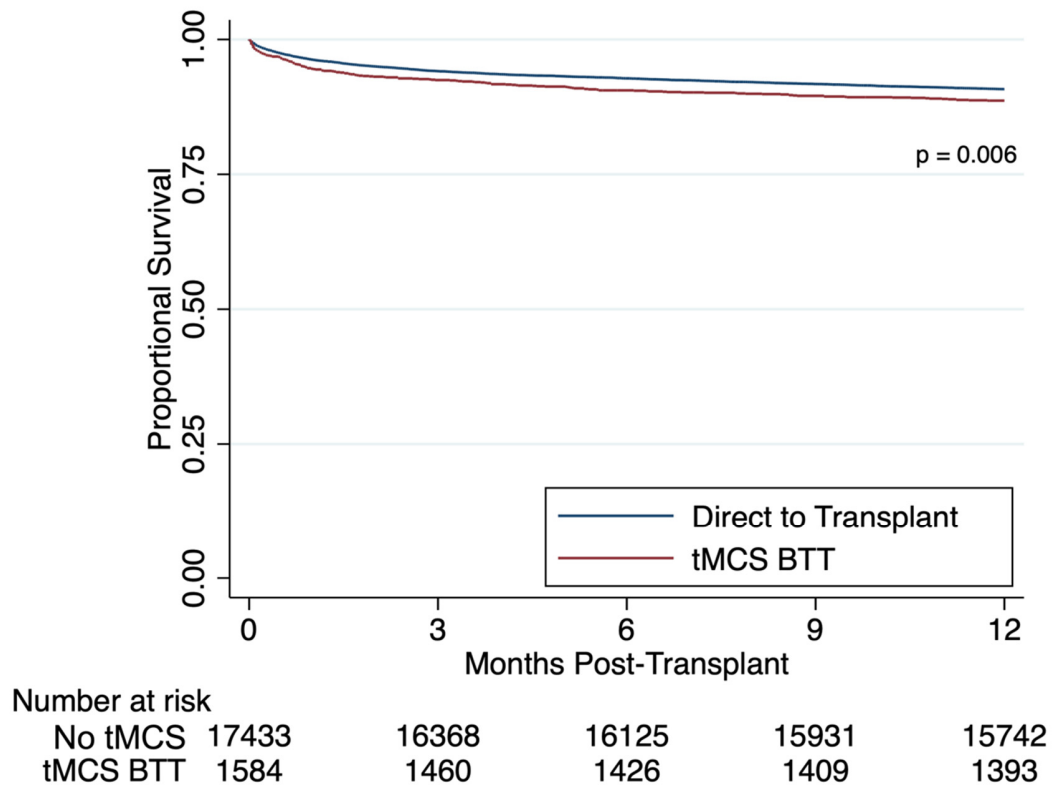

**Figure S2.** Precision recall curve for the XGBoost model. The color legend on the right represents a certain pair of sensitivity and false positive rate for each point on the curve.

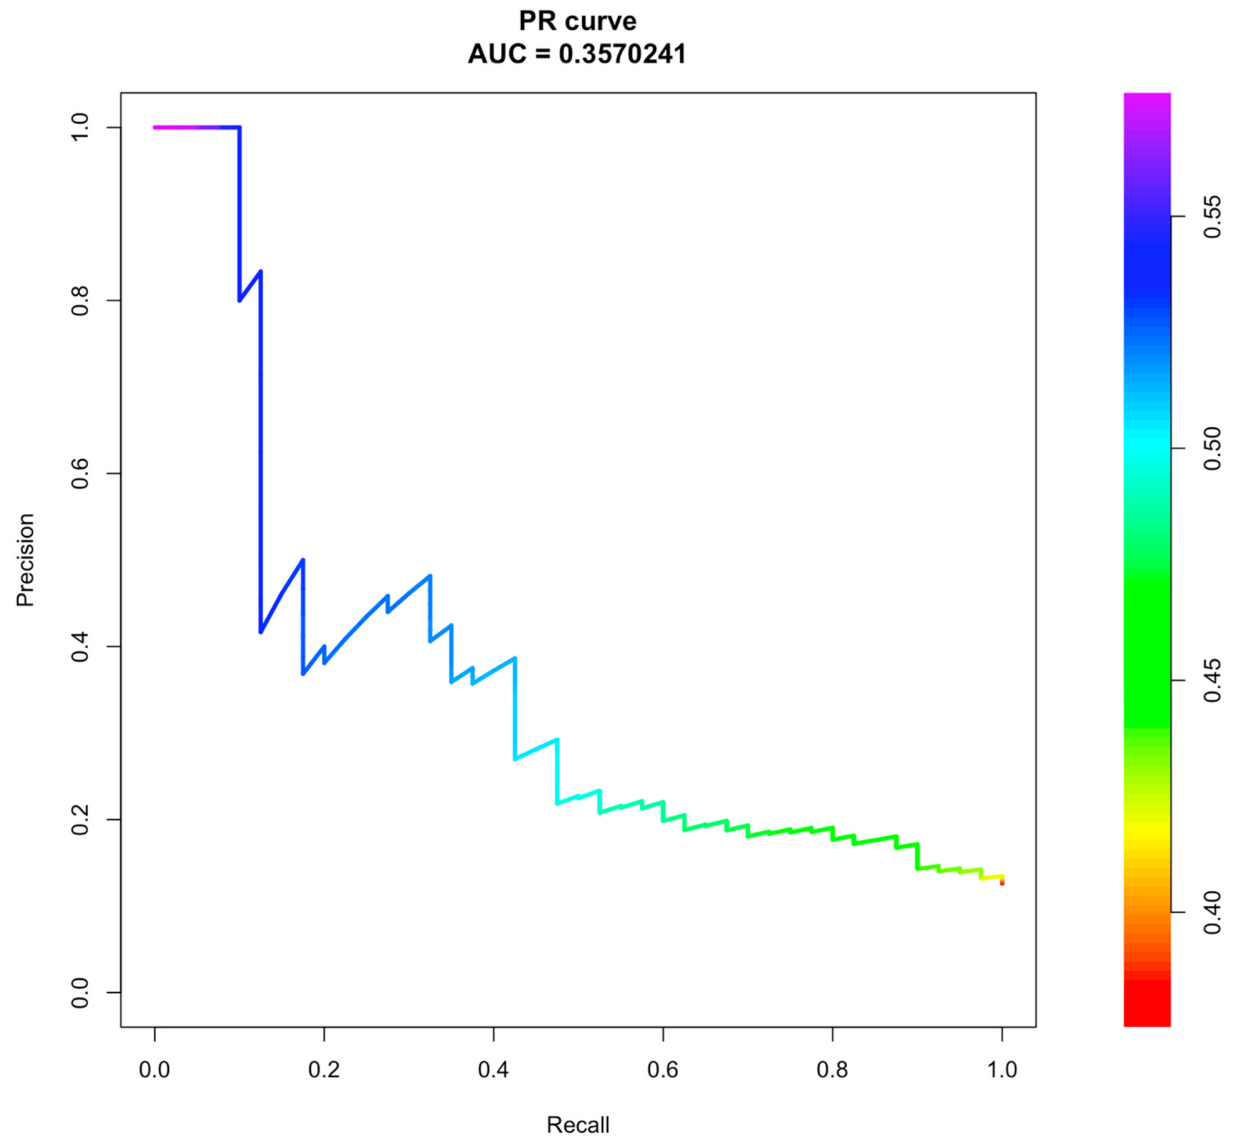

**Figure S3.** SHAP dependence plot for actual age vs. age SHAP value. A clear threshold is observed between ages 53 and 54, above which the model predicted death (above 0.00 on y-axis) and below which the model predicted survival (under 0.00 on y-axis).

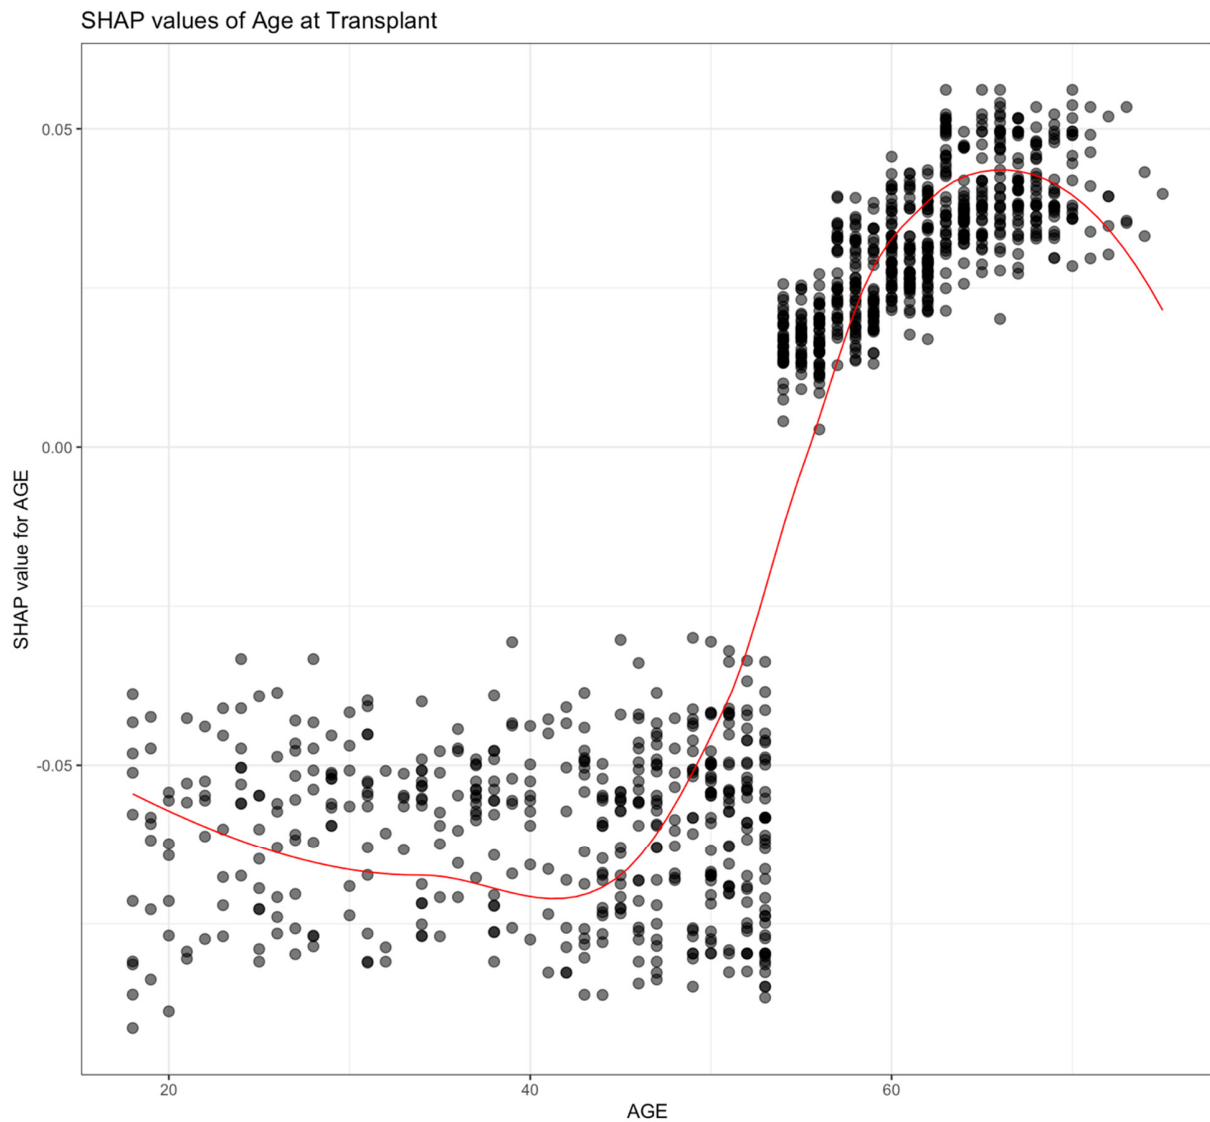

Supplement: s1 [file s1]
